# Supplementary material
Source: publisher figshare collection journal article supplement (https://acs.figshare.com/ndownloader/files/3958354)
Supplement: Supplementary file 1 [file 3958354]

Quantum Mechanical/Molecular Mechanical Study  
of Catalytic Mechanism and Role of Key Residues  
in Methylation Reactions Catalyzed by  
Dimethylxanthine Methyltransferase in Caffeine  
Biosynthesis

*Yufei Yue and Hong Guo\**

Department of Biochemistry and Cellular and Molecular Biology, University of Tennessee,  
Knoxville, Tennessee 37996, United States

## Supporting Information

Figure S1, S2 and S3. This material is available free of charge via the Internet at

<http://pubs.acs.org>.

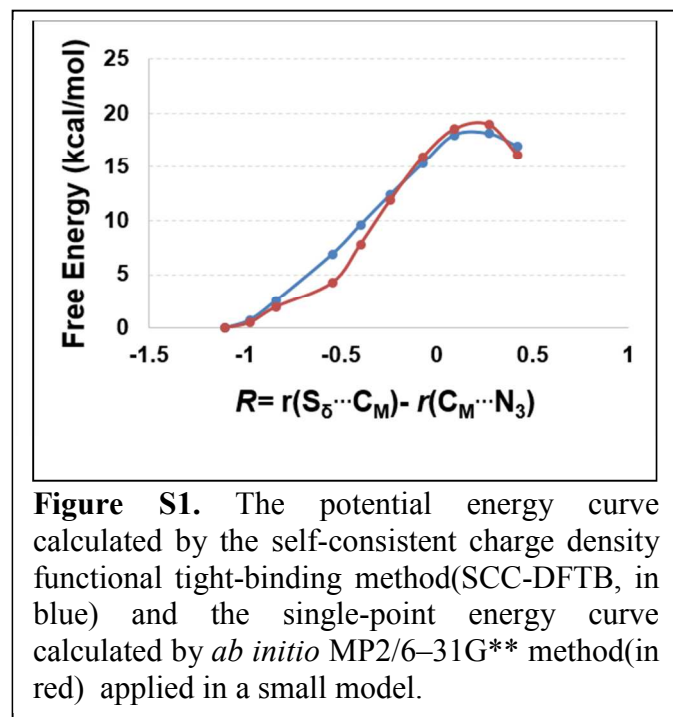

**Figure S1.** The potential energy curve calculated by the self-consistent charge density functional tight-binding method(SCC-DFTB, in blue) and the single-point energy curve calculated by *ab initio* MP2/6-31G\*\* method(in red) applied in a small model.

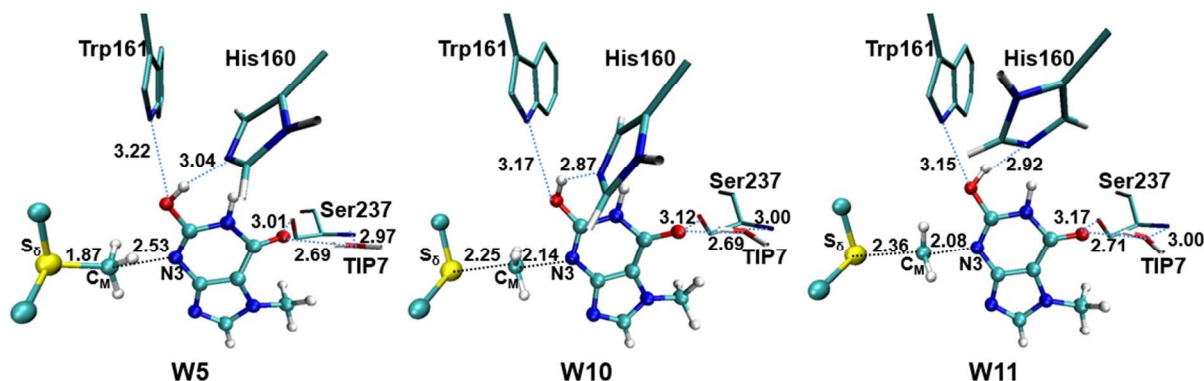

**Figure S2.** The average active-site structures during the free energy simulation of N3 methylation (7mX→Tb) with the O–H covalent bond on 7mX fixed. The average structures in Window 5(W5, before reaching TS), Window 10(W10, near TS) and Window 11(W11, passed near TS) of N3 methylation are shown.

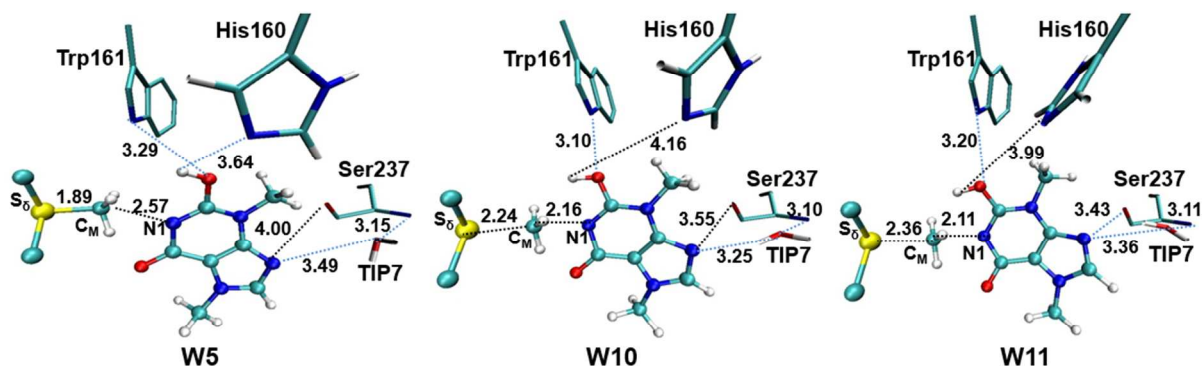

**Figure S3.** The dynamics of active site during the free energy simulation of N1 methylation (Tb→Cf) with the O–H covalent bond on Tb fixed. The average structures in window 5(W5, before the transition state (TS)), window 10(W10, approaching near TS), window 11(W11, passed near TS) of N1 methylation are shown.
